# Supplementary material for: An Avirulent Strain of Soybean Mosaic Virus Reverses the Defensive Effect of Abscisic Acid in a Susceptible Soybean Cultivar
Source: PubMed Central journal article supplement (PMC6783863; doi:10.3390/v11090879), 2019-09-19
Supplement: viruses-11-00879-s001.pdf [file viruses-11-00879-s001.pdf]

**Fig. S1. Expression levels of *Rsv3* gene in response to G7H infection, ABA treatment, or both.** The first trifoliolate leaf was sprayed with ABA one day before G7H infection, and received another treatment after three days. Leaves were collected at 5 dpi for expression analysis.

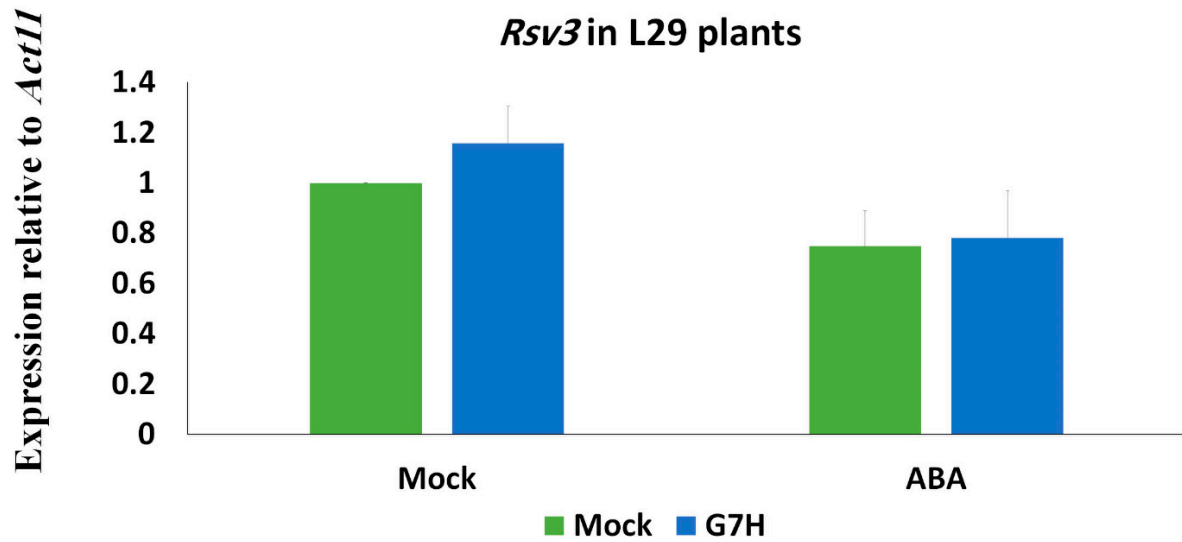

**Table S1. The primers used in this study.**

| Gene Name | Fw (5'→3')               | Rv (5'→3')            |
|-----------|--------------------------|-----------------------|
| AGO1b     | CTCACCTTGCTGCATTCCGT     | TGCAACAGCACCACCTTGTC  |
| AGO3b     | TGAAGCAAGGATCAGGATGCA    | TCCAGGTCAGCATGCAATGT  |
| AGO5b     | AGGAACTAGTCGACCAACACA    | TCGAGTACACCTTGCATACGT |
| AGO6a     | TTGGTTTCTCGGCAGATGGC     | GCAGCATGGTGAGCATAGCA  |
| AGO7b     | ATTTCTTTGGTGCCTCCTGC     | GGTGCTGTCTTTGGAGGAGC  |
| AGO9      | TGGGTTTCGCGGTATTGGTTG    | TCTTCCTCCTCCTGCAACCC  |
| AGO10c    | GCGCGGTTCTATATGGAGCC     | TCTTGTTGCCTTGGAGCCAC  |
| DCL2a     | GGCGGTGCTCATAAGGACAC     | ACCCTTGTGCACAGTACACA  |
| DCL4a     | GAGGGACCAGACCACCTGAA     | CCATAATGCACCCTCTGCCG  |
| RDR1a     | TCCAAGTTACTGGGGTTGCT     | ACGCAACCCACTGAAACTGT  |
| RDR2a     | GGTAACGTGCAAACCGTGC      | ACGCGGTTGGCAACTAGTTT  |
| RDR6a     | CAGTTGATTACCTAGCTCGC     | GAGCAAGCTCTCAATGGAAT  |
| PP2C3a    | TGAAGTTGCGTGCCAAGTTG     | TCGGTAGCACGGTTTTGATG  |
| Actin     | ATCTTGACTGAGCGTGGTTATTCC | GCTGGTCCTGGCTGTCTCC   |
